# Supplementary material for: The phenotypic signature of adaptation to thermal stress in Escherichia coli
Source: PubMed Central journal article supplement (PMC4557228; doi:10.1186/s12862-015-0457-3), 2015-09-02

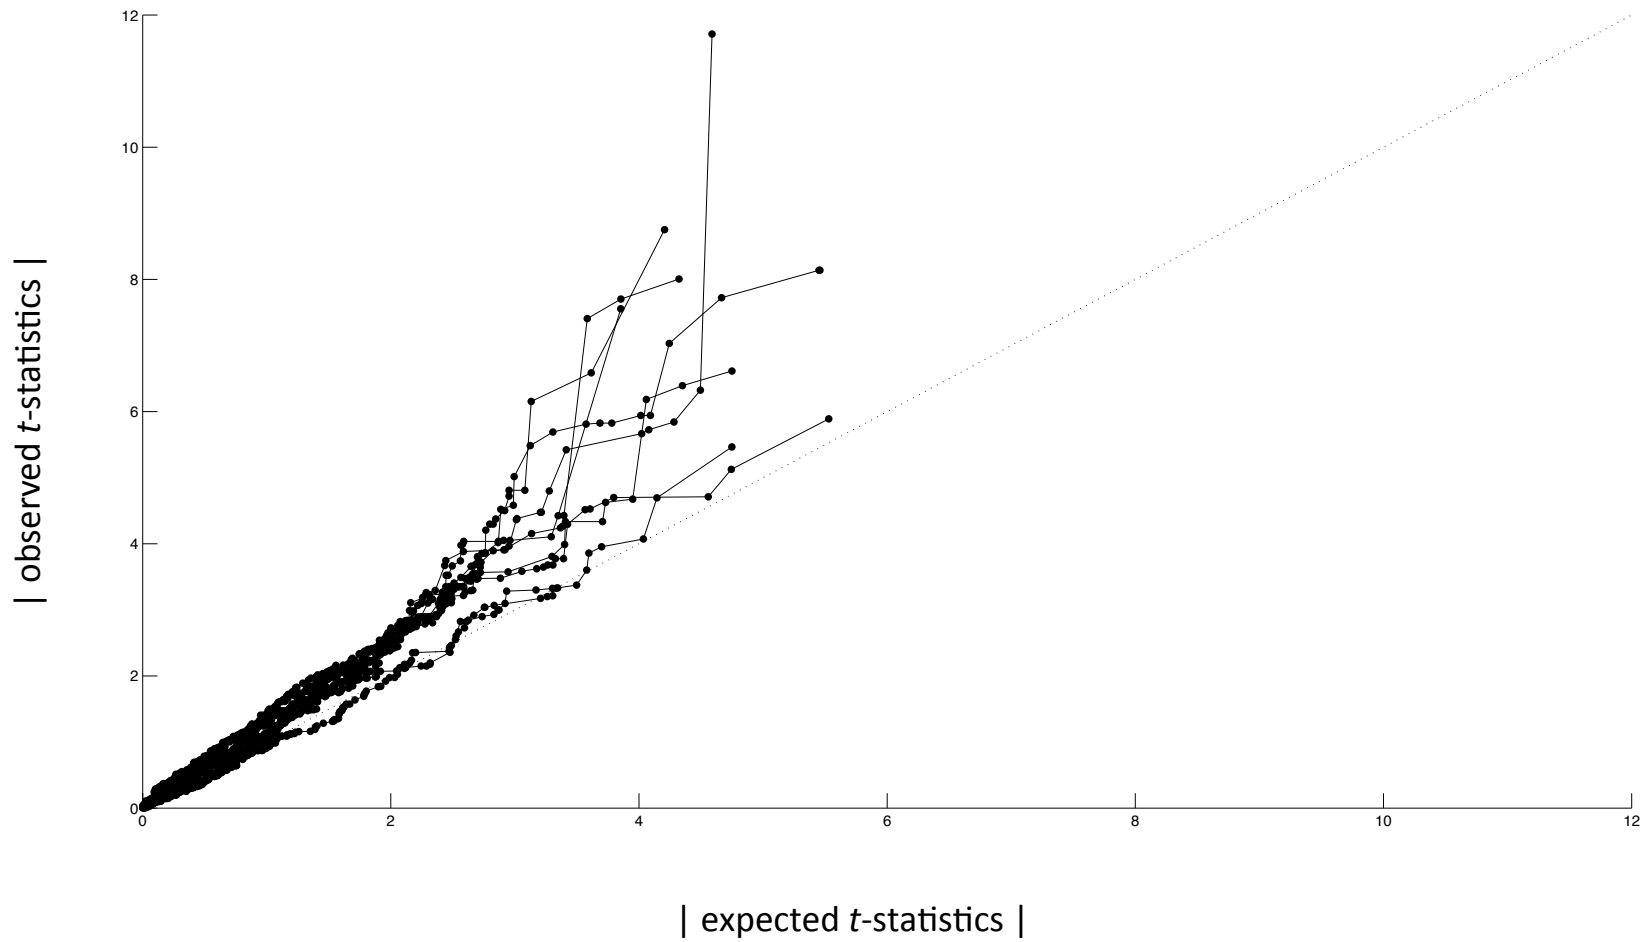

Supplement: 12862_2015_457_MOESM5_ESM.pdf [file 12862_2015_457_MOESM5_ESM.pdf]
